# Supplementary material for: A porous material excited by near-infrared light for photo/chemodynamic and photothermal dual-mode combination therapy
Source: Royal Society of Chemistry journal article supplement (doi:10.1039/d0tb01794a), 2020-01-01
Supplement: d0tb01794a1.pdf [file d0tb01794a1.pdf]

## **Electronic supporting information**

A porous material excited by near-infrared light for  
photo/chemodynamic and photothermal dual-mode  
synergistic therapy

Mingdi Sun, Dan Yang\*, Qianqian Sun, Tao Jia, Ye Kuang, Shili Gai, Fei He, Fangmei  
Zhang, Piaoping Yang\*

Key Laboratory of Superlight Materials and Surface Technology, Ministry of  
Education, College of Material Sciences and Chemical Engineering, Harbin  
Engineering University, Harbin, 150001, P. R. China

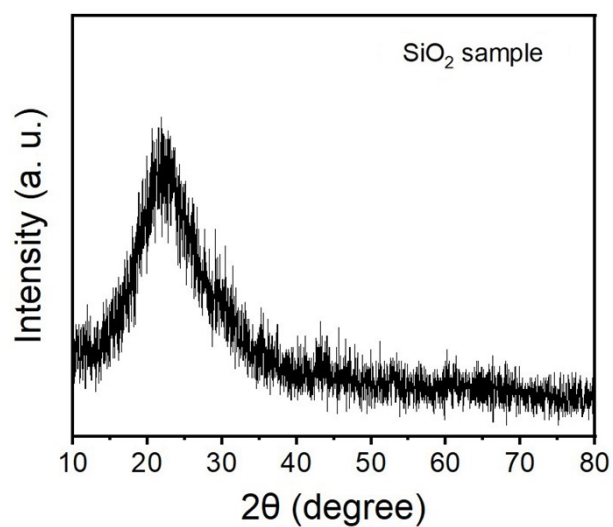

**Fig. S1** The XRD of SiO<sub>2</sub> NT.

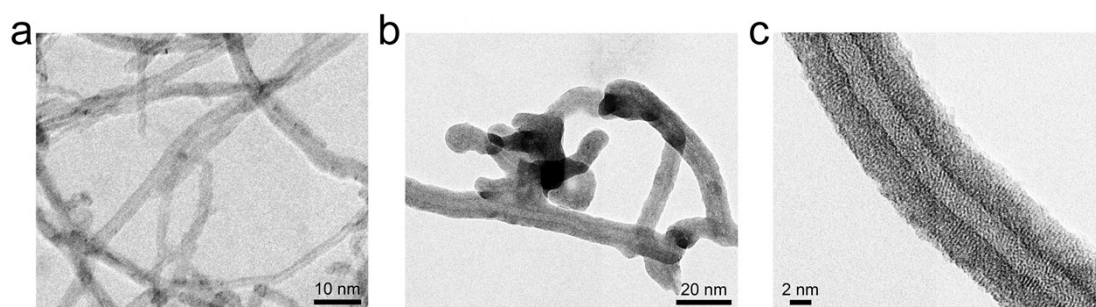

**Fig. S2** The TEM image of CNT (a) and SiO<sub>2</sub> NT (b). The HRTEM image of SiO<sub>2</sub> NT (c).

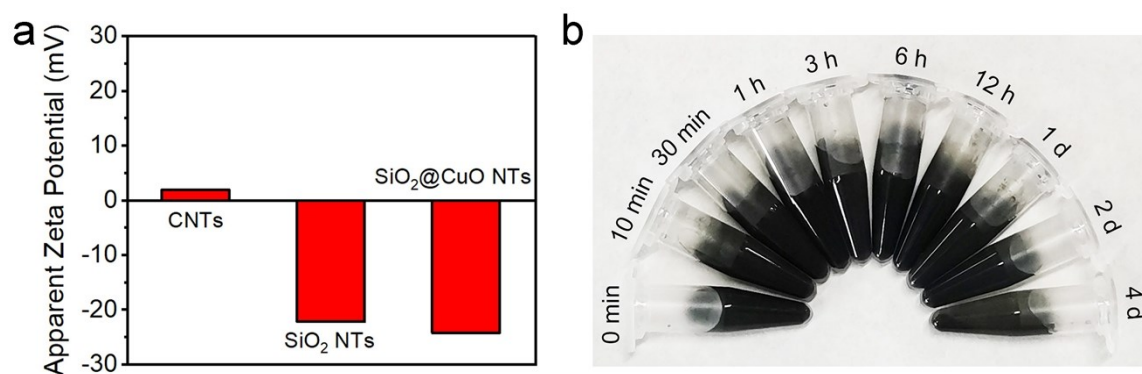

**Fig. S3** (a) The zeta potential of each step material. (b) The stability of SiO<sub>2</sub>@CuO NT at room temperature.

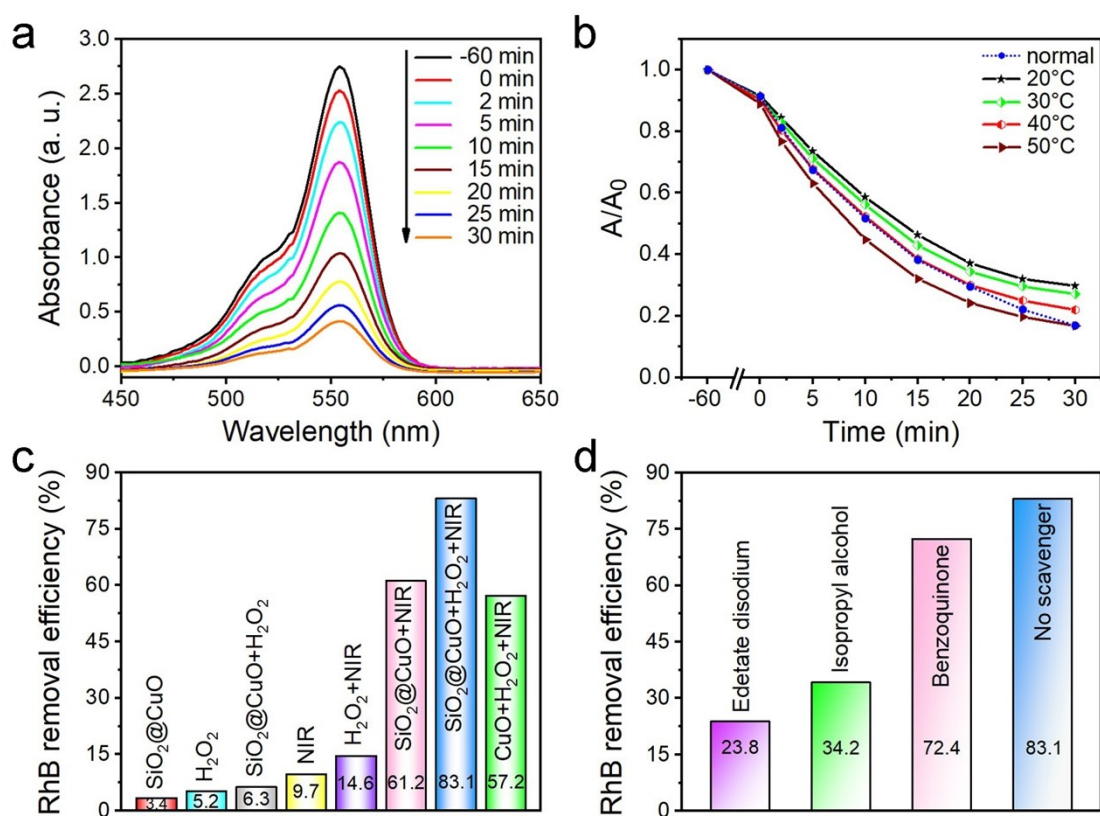

**Fig. S4** (a) The UV-*vis* spectrum of RhB with SiO<sub>2</sub>@CuO NT under 808 nm lasers irradiation for diverse time points. (b) The absorption intensity changes of RhB at different temperatures for a time extension. (c) The degradation efficiencies of RhB under different experimental conditions. (d) The degradation efficiencies of RhB in different scavenger solutions. In all solutions containing H<sub>2</sub>O<sub>2</sub>, the amount of H<sub>2</sub>O<sub>2</sub> added is 0.384 wt%.

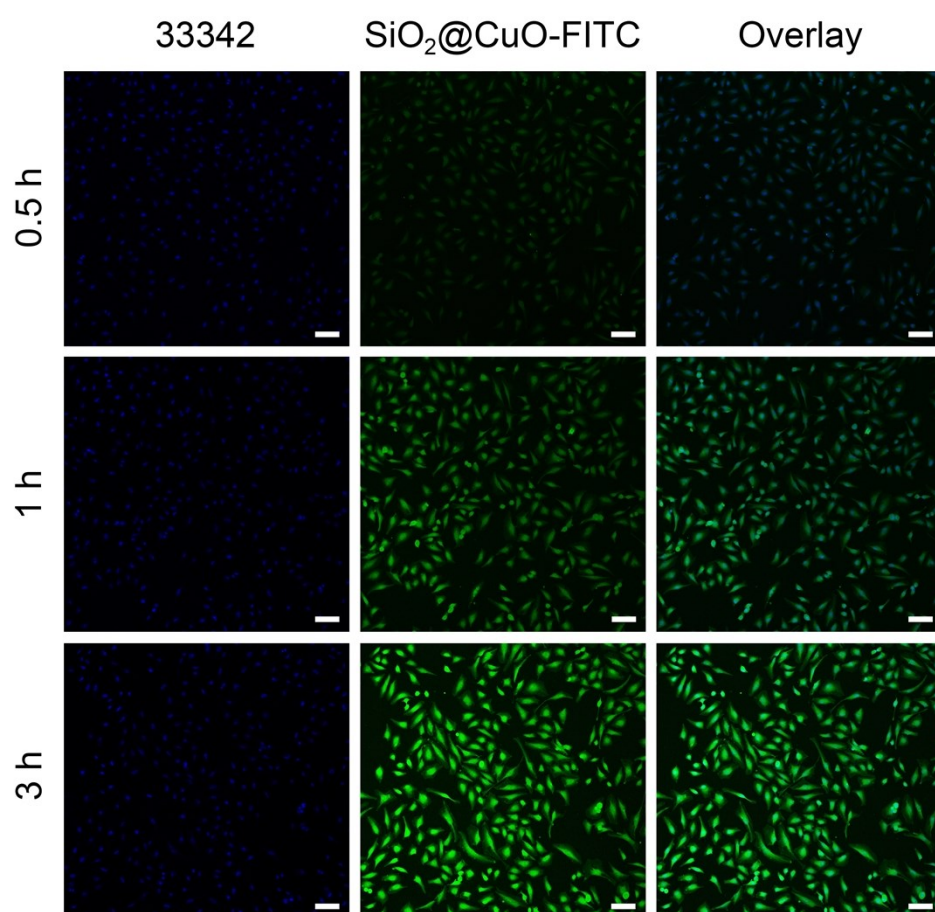

**Fig. S5** Cellular uptake of SiO<sub>2</sub>@CuO-FITC nanocomposite. All the scale labels are 100  $\mu$ m.

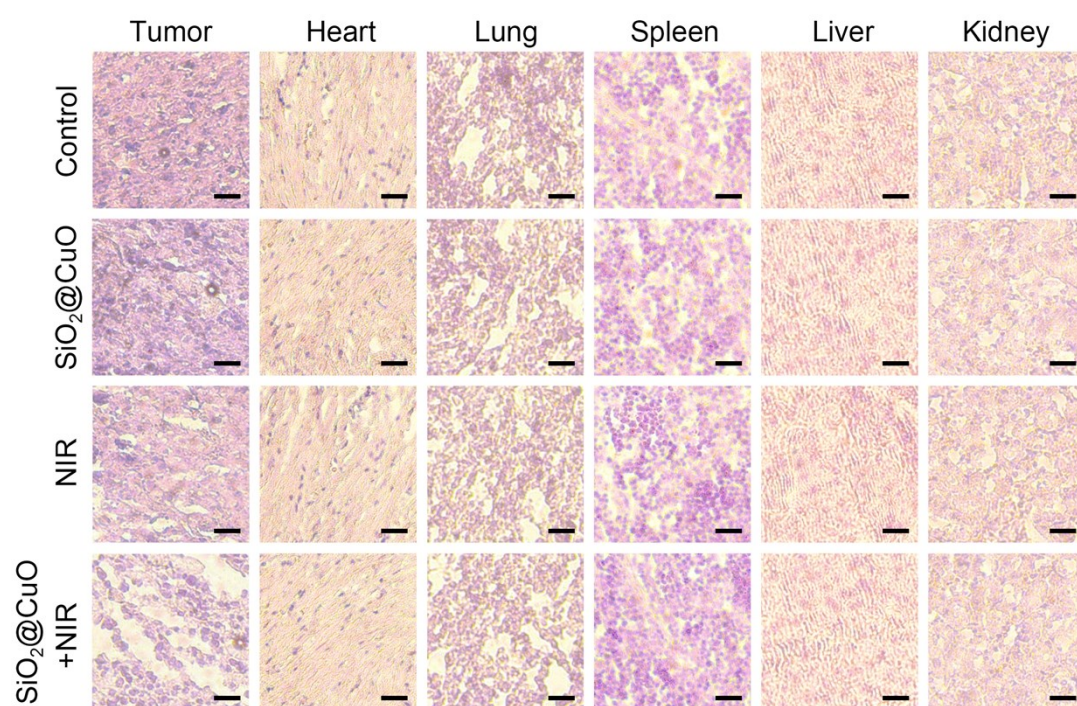

**Fig. S6** H&E-stained CLSM images of tumors and major organs in four groups. All the scale labels are 20  $\mu\text{m}$ .

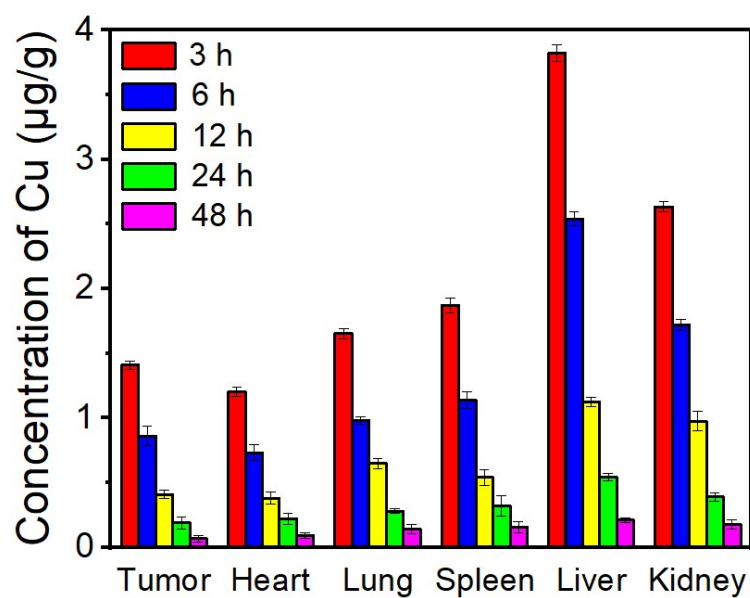

**Fig. S7** Biodistribution of  $\text{SiO}_2\text{@CuO}$  NT in mice characterized by the concentration of Cu ( $n = 5$ ).
